# Supplementary material for: The association between anemia and falls in community-living women and men aged 65 years and older from the fifth Tromsø Study 2001-02: a replication study
Source: PubMed Central journal article supplement (PMC5745627; doi:10.1186/s12877-017-0689-8), 2017-12-27
Supplement: 12877_2017_689_MOESM2_ESM.pdf [file 12877_2017_689_MOESM2_ESM.pdf]

## Additional file 2

**Comparison table of study sample characteristics by sex, mean (SD) or percentages (number of total number measured (n/N)).  
The Tromsø 5 Study 2001-2002 and the KORA-Age Study 2009.**

| Variable                                      | Tromsø 5<br>All<br>(N=2441) | KORA-Age<br>All<br>(N=967) | Tromsø 5<br>Women<br>(n=1321) | KORA-Age<br>Women<br>(n=477) | Tromsø 5<br>Men<br>(n=1120) | KORA-Age<br>Men<br>(n=490) | p-value <sup>1</sup> |
|-----------------------------------------------|-----------------------------|----------------------------|-------------------------------|------------------------------|-----------------------------|----------------------------|----------------------|
| Mean age, years                               | 72.0 (4.8)                  | 76.0 (6.5)                 | 72.3 (4.8)                    | 76.0 (6.6)                   | 71.8 (4.8)                  | 75.9 (6.4)                 | <0.0001              |
| Falls <sup>2</sup> , n (%)                    | 33 (803/2441)               | 14 (143/967)               | 33 (442/1321)                 | 19 (91/477)                  | 32 (361/1120)               | 11 (52/490)                | <0.0001              |
| Anemia <sup>3</sup> , n (%)                   | 8 (188/2441)                | 18 (171/967)               | 6 (85/1312)                   | 16 (75/477)                  | 9 (103/1120)                | 20 (96/490)                | <0.0001              |
| Hemoglobin, g/dl                              | -                           | -                          | 13.4 (1.0)                    | 13.0 (1.0)                   | 14.4 (1.1)                  | 14.0 (1.3)                 | <0.0001              |
| Multimorbidity <sup>4</sup> , n (%)           | 4 (74/1825)                 | 9 (82/967)                 | 4 (34/932)                    | 8 (38/477)                   | 4 (40/893)                  | 9 (44/490)                 | <0.0001              |
| Disability <sup>5</sup> , n (%)               | 26 (339/1284)               | 25 (238/967)               | 31 (220/701)                  | 31 (147/477)                 | 20 (119/583)                | 19 (91/490)                | 0.333                |
| Frailty <sup>6</sup> , n (%)                  | 39 (232/592)                | 42 (401/967)               | 47 (141/302)                  | 41 (196/477)                 | 31 (91/290)                 | 42 (205/490)               | 0.367                |
| Hypertension <sup>7</sup> (%)                 | 65 (1592/2440)              | 75 (726)                   | 68 (892/1321)                 | 75 (359/477)                 | 63 (700/1119)               | 75 (367/490)               | <0.0001              |
| Use of antihypertensives <sup>8</sup> , n (%) | 31 (741/2363)               | 69 (664/967)               | 31 (339/1277)                 | 69 (328/477)                 | 31 (342/1086)               | 69 (336/490)               | <0.0001              |
| Use of ≥5 drugs <sup>8</sup> , n (%)          | 16 (293/1841)               | 32 (305/967)               | 15 (157/1044)                 | 31 (149/477)                 | 17 (136/797)                | 32 (156/490)               | <0.0001              |
| Body mass index, kg/m <sup>8</sup>            | 26.7 (4.1)                  | 28.4 (4.2)                 | 27.0 (4.5)                    | 28.4 (4.6)                   | 26.4 (3.5)                  | 28.4 (3.9)                 | <0.0001              |

<sup>1</sup>P-value for study sample difference, total sample (two-sided t-test for comparisons of means for continuous variables and Chi-square test for categorical variables)

<sup>2</sup>Self-reported fall last year

<sup>3</sup>WHO criteria (<12 g/dl in women, <13g/dl in men)

<sup>4</sup>Tromsø 5: Modified Charlson-Comorbidity Index (self-reported ≥3 of the following: asthma/emphysema/chronic bronchitis, cancer (ever), diabetes, stroke, coronary heart disease, peptic ulcer)

<sup>4</sup>KORA-Age: Modified Charlson-Comorbidity-Index (self-reported ≥3 diseases)

<sup>5</sup>Tromsø 5: Self-reported functional status (moving around in the home, getting out of the home, participate in leisure activities, using public transport, daily shopping)

<sup>5</sup>KORA-Age: Self-reported functional status by the Stanford Health Assessment Questionnaire (dressing, arising, eating, walking, hygiene, reach, grip, activities)

<sup>6</sup>Modified Fried's criteria (low walking speed, low grip strength, exhaustion, low physical activity level (Tromsø 5 and KORA-Age) and weight loss (KORA-Age only)).

<sup>7</sup>Tromsø 5: Blood pressure >140/90mmHg

<sup>7</sup>KORA-Age: Unknown definition

<sup>8</sup>Tromsø 5: Self-reported drugs used on a regular basis

<sup>8</sup>KORA-Age: Self-reported drug intake last 7 days of prescribed drugs used on a regular basis
