# Supplementary material for: The association between anemia and falls in community-living women and men aged 65 years and older from the fifth Tromsø Study 2001-02: a replication study
Source: BMC Geriatr. 2017 Dec 27;17:292. doi: 10.1186/s12877-017-0689-8 (PMC5745627; doi:10.1186/s12877-017-0689-8)
Supplement: Supplementary file 1 — Comparison of variables in The Tromsø 5 Study 2001-01 and the KORA-Age Study 2009. A list of available variables in the Tromsø 5 Study and in the KORA-Age Study used in the analysis, presenting the comparability between the studies. (PDF 211 kb) [file 12877_2017_689_MOESM1_ESM.pdf]

## Additional file 1

### Comparison of variables in The Tromsø 5 Study 2001-01 and the KORA-Age Study 2009.

#### The Tromsø 5 Study 2001-02

##### History of falls

*"Did you ever fall last year?"* ("No"=0, "Yes"=1, "I do not know"=missing)

##### Hemoglobin (g/dL)

**Anemia** (WHO criteria: Women <12 g/dL=1, Men<13 g/dL=1)

**Age** (years, age group 65-74 year and 75+ years)

##### Sex

**Frailty** (modified Fried's criteria) ≥1 of the following:

Grip strength (Martins vigorimeter, ≤20% weakest)

Timed Up and Go Test (≥15 seconds=1)

Physical activity level (self-reported)

*"How has your physical activity in leisure time been during this last year? Think of your weekly average for the year"* (hours per week).

Light physical activity (not sweating or out of breath).

("None"=0, "Less than 1"=1, "1-2"=1

"3 or more"=1)

Hard physical activity (sweating/out of breath).

("None"=0, "Less than 1"=1, "1-2"=1

"3 or more"=1)

Exhaustion (single item, the Hospital Symptom Checklist-10)

*Have you experienced any of the following the last week: "That everything is a struggle?"*

("No complaint" or "Little complaint" =0, "Pretty much", "Very much"=1)

##### Disability (self-reported)

Due to chronic health problems;

*"Is it difficult to move around in your home?"*

*"Is it difficult to get out of your home by yourself?"*

*"Is it difficult to participate in organizations or other leisure time activities?"*

*"Is it difficult to use public transport?"*

*"Is it difficult to perform daily shopping?"*

("No difficulties"=0, "Some difficulties"=1, "Great difficulties"=1)

**Comorbidity** (modified Charlson Comorbidity Index, i.e. number of diseases without weighting, self-reported)

≥ 3 of the following diseases=1:

asthma/emphysema/chronic bronchitis, cancer (ever), diabetes, stroke, heart attack/angina pectoris, peptic ulcer

**Hypertension** (blood pressure >140/90 mmHg)

**Number of drug used** on a regular basis (self-reported)

#### The KORA-Age Study 2009

##### History of falls

*"Did you fall in the previous year?"* ("No"=0, "Yes once"=1, "Yes more than once"=1 )

##### Hemoglobin (g/dL)

**Anemia** (WHO criteria: Women <12 g/dL=1, Men<13 g/dL=1)

**Age** (years, age group 65-74 year and 75+ years)

##### Sex

**Frailty** (modified Fried's criteria) ≥1 of the following:

Weight loss last 6 months (short German SCREEN II Questionnaire)

Grip strength low (JAMAR dynamometer, cut-off not reported)

Timed Up and Go Test low (cut-off not reported)

Physical activity level low (Physical Activity Scale for the Elderly, cut-off not reported)

Fatigue (self-reported, questionnaire/phrasing cut-off not reported)

##### Disability (Health Assessment Questionnaire Disability index)

Dressing, Rising, Eating, Walking, Hygiene, Reach, Grip, Usual activities (cut-off not reported)

**Comorbidity** (modified Charlson Comorbidity Index, i.e number of diseases, self-reported)

. ≥3 of the following diseases =1:

asthma/emphysema/chronic bronchitis, cancer (past 3 years), diabetes, stroke, heart trouble, digestive problems, arthritis/rheumatism, HIV/AIDS, kidney disease, liver problems

**Hypertension** (cut-off not reported)

**Numbers of prescribed drugs** used last 7 days (self- reporte
